# Supplementary material for: Precision in cancer diagnostics: ultra-sensitive detection of MCF-7 breast cancer cells by gold nanostructure-enhanced electrochemical biosensing
Source: Royal Society of Chemistry journal article supplement (doi:10.1039/d4tb00454j), 2024-01-01
Supplement: d4tb00454j1.pdf [file d4tb00454j1.pdf]

# **Precision on Cancer Diagnostics: An Ultra-Sensitive Detection of MCF-7 Breast Cancer Cells by Gold Nanostructure-Enhanced Electrochemical Biosensing**

Mahsa Rahmanipour<sup>1</sup>, Hossein Siampour<sup>3</sup>, Ahmad Moshaii<sup>1,2\*</sup>, Masoud Amirabadizadeh<sup>4</sup>,  
Mohamad hassan Fouani<sup>4</sup>, Laleh Shariati<sup>5,6</sup>, Mohammad Rafienia<sup>3\*</sup>

<sup>1</sup> Department of Physics, Tarbiat Modares University, P.O.Box: 14115-175, Tehran, Iran

<sup>2</sup> Department of Sensor and Biosensor, Faculty of Interdisciplinary Sciences and Technologies, Tarbiat Modares University, P.O.Box: 14115-336, Tehran, Iran

<sup>3</sup> Biosensor Research Center (BRC), Isfahan University of Medical Sciences, P.O.Box: 81746-73461, Isfahan, Iran

<sup>4</sup> Department of Nanobiotechnology, Faculty of Biological Sciences, Tarbiat Modares University, P.O. Box: 14115-154, Tehran, Iran

<sup>5</sup> Applied Physiology Research Center, Cardiovascular Research Institute, Isfahan University of Medical Sciences, Isfahan, Iran

<sup>6</sup> Department of Biomaterials, Nanotechnology, And Tissue Engineering, School of Advanced Technologies in Medicine, Isfahan University of Medical Sciences, Isfahan, Iran

\*E-mail: [moshaii@modares.ac.ir](mailto:moshaii@modares.ac.ir), \*ORCID: 0000-0002-5708-3949

\*E-mail: [m\\_rafienia@med.mui.ac.ir](mailto:m_rafienia@med.mui.ac.ir)

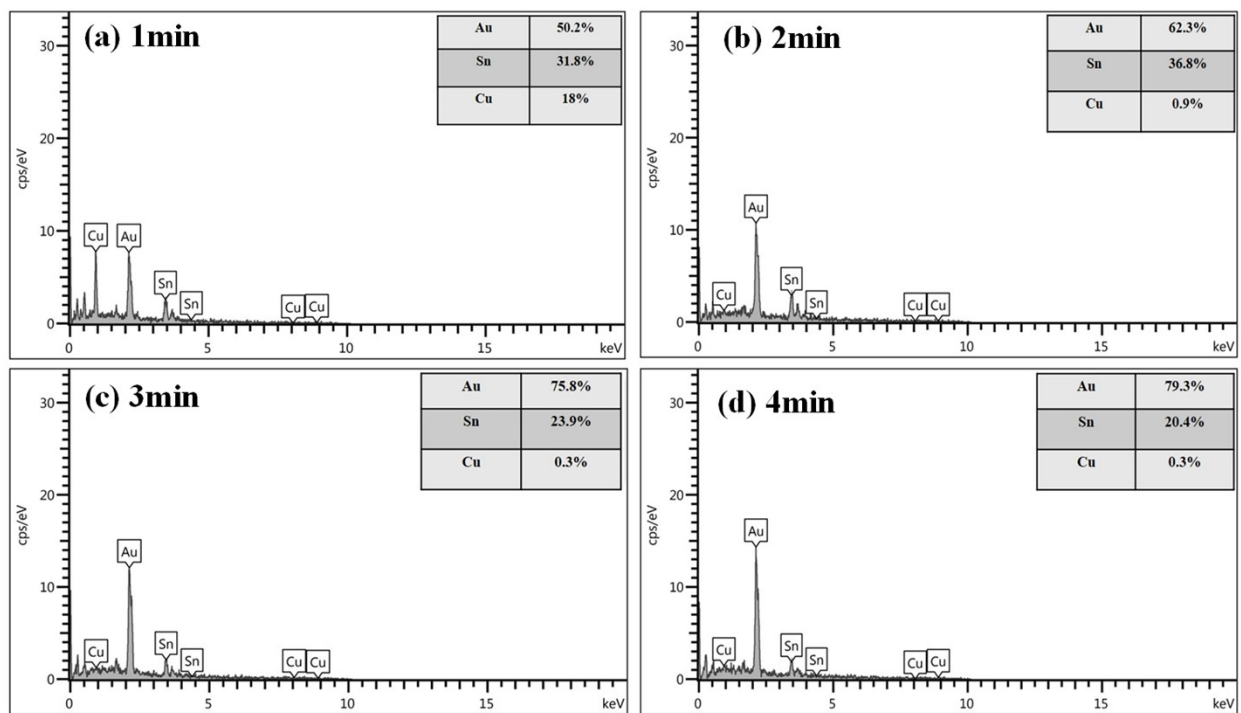

**Figure. S1** EDX mapping spectra and elemental composition of Au electrode with different galvanic reaction times.

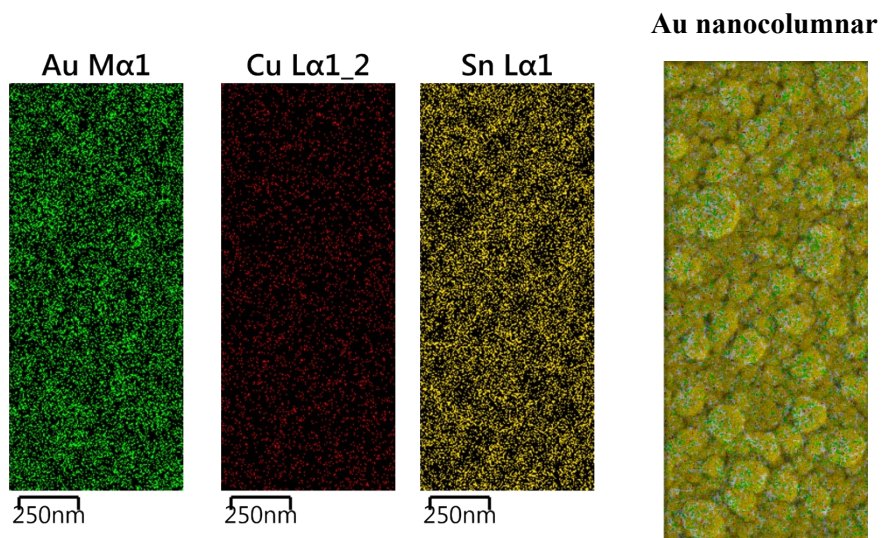

**Figure. S2** The elemental mapping of optimal gold nanocolumnar structure.

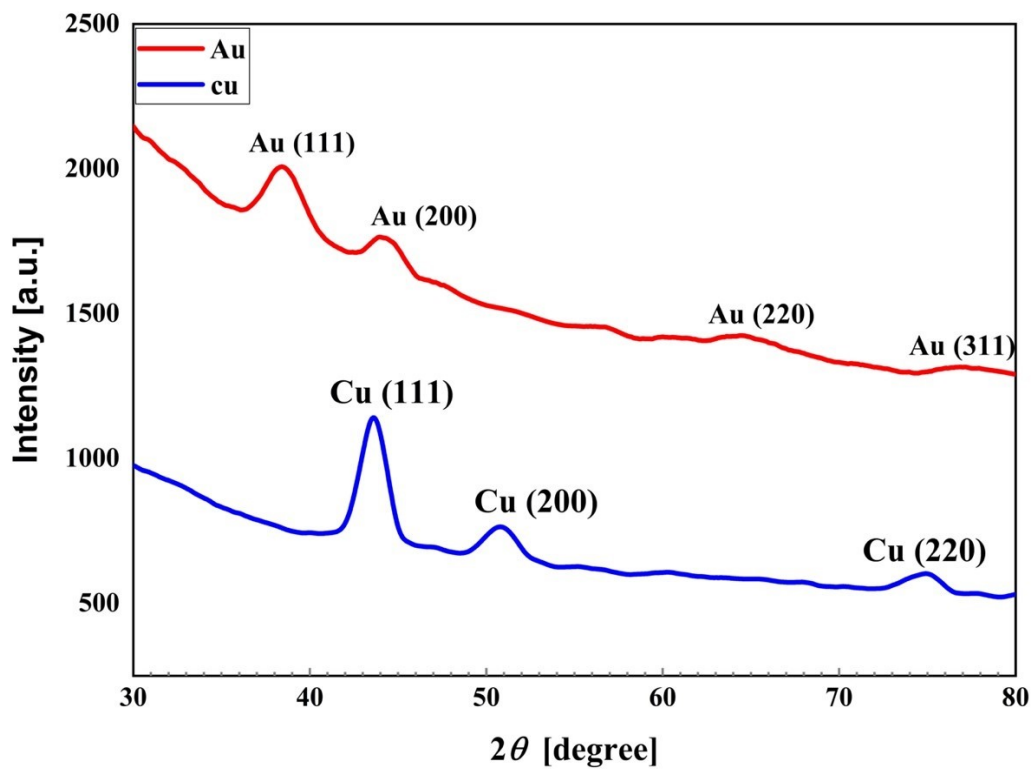

**Figure. S3** XRD spectra of the as-prepared Cu and Au electrode (concentration of  $\text{HAuCl}_4$  3 mM and the galvanic reaction time of 3 min).

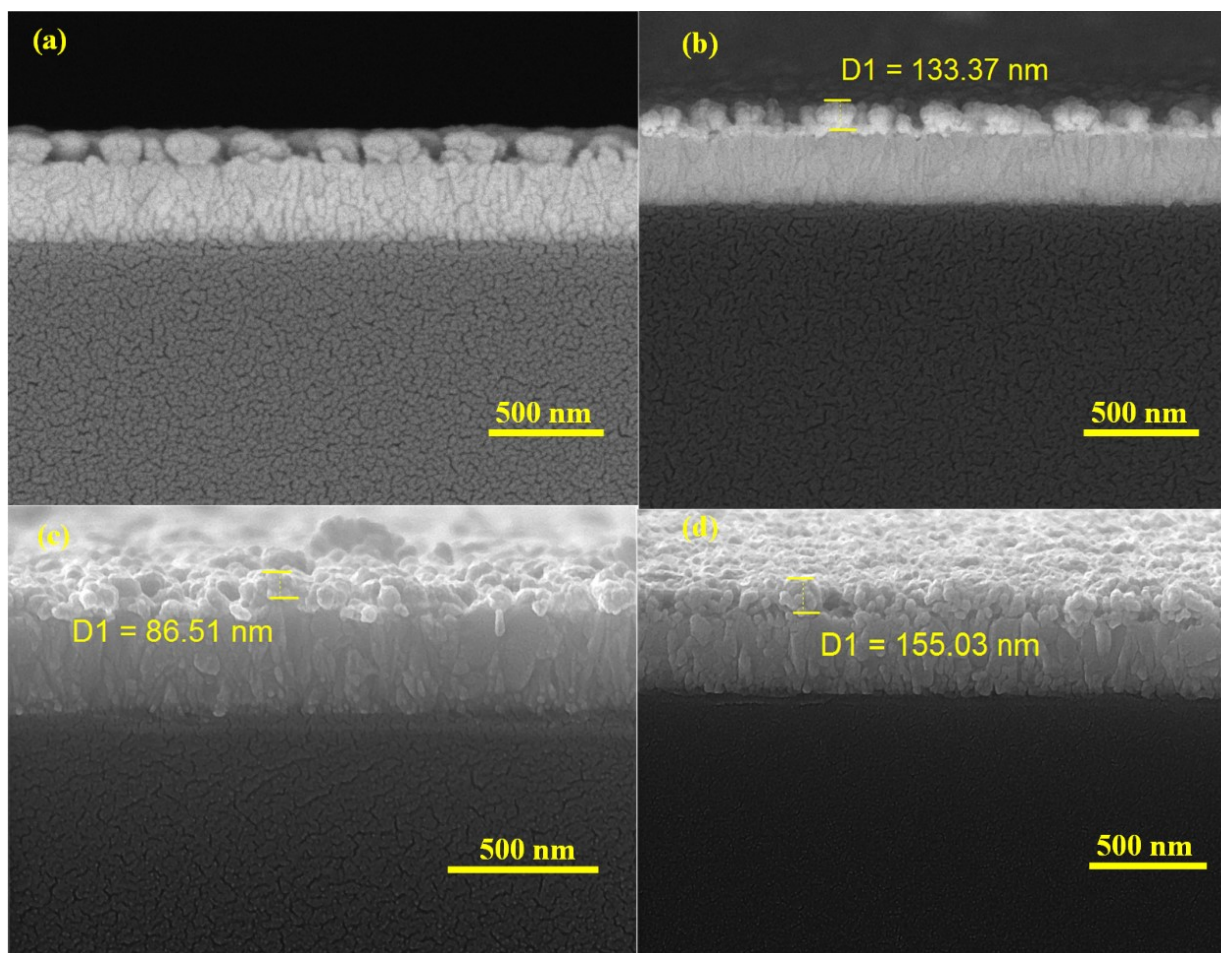

**Figure. S4** The cross-sectional SEM image of the Cu nanocolumns (a), the superior Au nanocolumns (b), the Au nanocolumns with concentration (4 mM  $\text{HAuCl}_4$ ) for 1min (c), the Au nanocolumns with concentration (3 mM  $\text{HAuCl}_4$ ) for 4min (d).

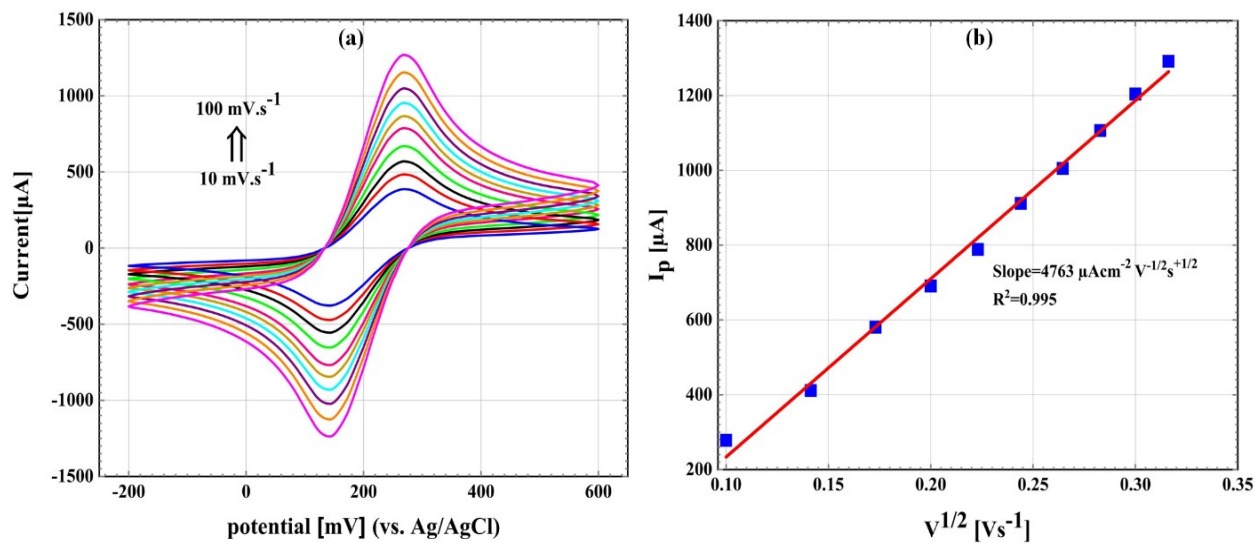

**Figure. S5** CV curves obtained for the superior electrode at various potential sweep rates within the range of 10–100 mV.s<sup>-1</sup> (a), and a linear relationship between the anodic current peak and the square root of the scan rate (b).

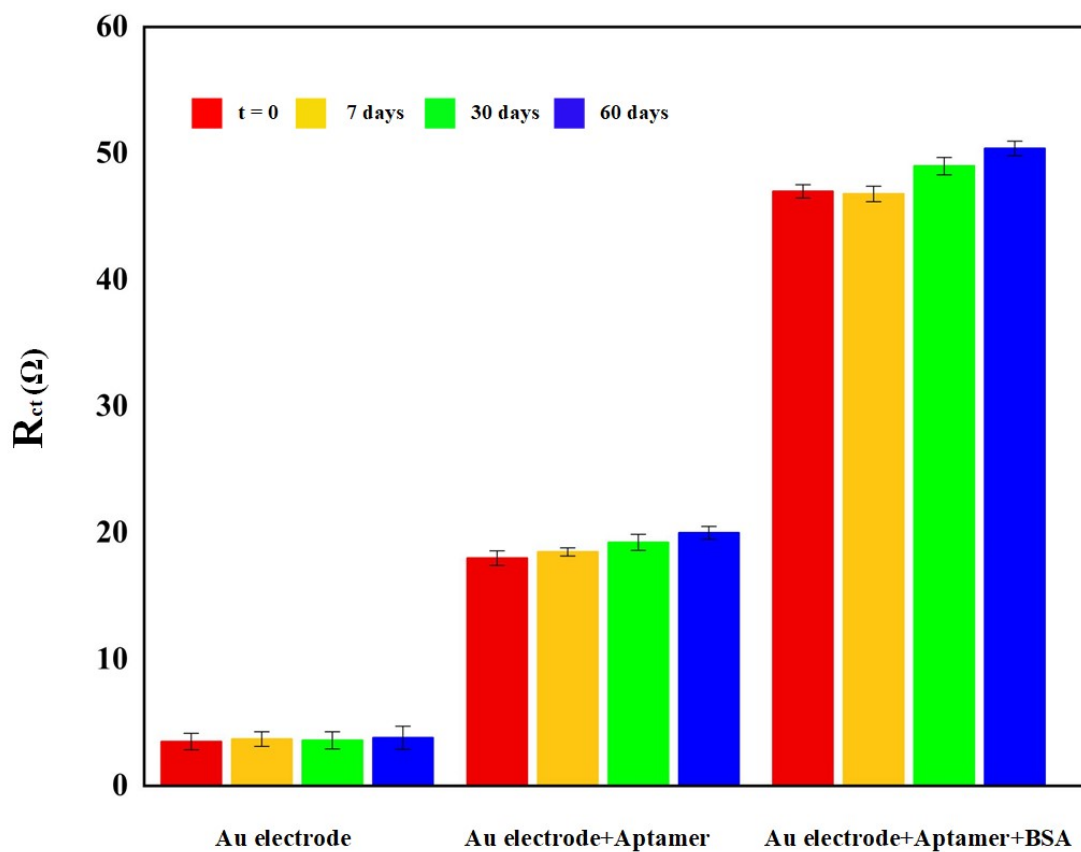

**Figure. S6** Stability assessment was conducted across various time intervals to evaluate the variations in charge transfer resistance ( $R_{ct}$ ) for the Au electrode alone, the Au electrode with aptamer, and the Au electrode with both aptamer and BSA.

**Table S1.** Mean  $R_{ct}$  values (averaged over three repetitions) for various steps of Aptasensor fabrication and measurement of MCF-7 cells.

| Electrode                        | Au    | Au+Aptamer | Au+Aptame+BSA | Au+Aptame+BSA+MCF-7<br>Cells (30 Cells.mL <sup>-1</sup> ) |
|----------------------------------|-------|------------|---------------|-----------------------------------------------------------|
| Mean of $R_{ct}$<br>( $\Omega$ ) | 6     | 19         | 49            | 148                                                       |
| RSD%                             | 16.67 | 5.26       | 2.04          | 1.16                                                      |
